# Supplementary material for: Growth Media Induces Variation in Cell Wall Associated Gene Expression in Arabidopsis thaliana Pollen Tube
Source: MDPI journal article supplement (doi:10.3390/plants2030429), 2013-06-25

## Supplementary Materials

**Table S1.** List of genes that were identified as principal contributors to the deviation observed in B over Q and W, in the PCA analysis.

| Affy ID     | AGI ID                 | Annotation (Lookup from 2010-12-20)—for multiple identifier mappings only the annotation for the first identifier is shown, except in the case of the multi-line output option                                                                                                                                                                                                                                                                                                                                                                                         |
|-------------|------------------------|------------------------------------------------------------------------------------------------------------------------------------------------------------------------------------------------------------------------------------------------------------------------------------------------------------------------------------------------------------------------------------------------------------------------------------------------------------------------------------------------------------------------------------------------------------------------|
| 245053_at   | At2g26450              | Plant invertase/pectin methylesterase inhibitor superfamily                                                                                                                                                                                                                                                                                                                                                                                                                                                                                                            |
| 245528_at   | At4g15530              | PPDK__pyruvate orthophosphate dikinase                                                                                                                                                                                                                                                                                                                                                                                                                                                                                                                                 |
| 245658_at   | At1g28270              | RALFL4__ralf-like 4                                                                                                                                                                                                                                                                                                                                                                                                                                                                                                                                                    |
| 245700_at   | At5g04180              | ACA3_ATACA3__alpha carbonic anhydrase 3                                                                                                                                                                                                                                                                                                                                                                                                                                                                                                                                |
| 245946_at   | At5g19580              | glyoxal oxidase-related protein                                                                                                                                                                                                                                                                                                                                                                                                                                                                                                                                        |
| 246123_at   | At5g20390              | Glycosyl hydrolase superfamily protein                                                                                                                                                                                                                                                                                                                                                                                                                                                                                                                                 |
| 246234_at   | At4g37280              | MRG family protein                                                                                                                                                                                                                                                                                                                                                                                                                                                                                                                                                     |
| 246491_at   | At5g16100              | unknown protein; Has 30201 Blast hits to 17322 proteins in 780 species: Archae, 12; Bacteria, 1396; Metazoa, 17338; Fungi, 3422; Plants, 5037; Viruses, 0; Other Eukaryotes, 2996 (source: NCBI BLink).                                                                                                                                                                                                                                                                                                                                                                |
| 246545_at   | At5g15110              | Pectate lyase family protein                                                                                                                                                                                                                                                                                                                                                                                                                                                                                                                                           |
| 246841_at   | At5g26700              | RmlC-like cupins superfamily protein                                                                                                                                                                                                                                                                                                                                                                                                                                                                                                                                   |
| 247512_at   | At5g61720              | Protein of unknown function (DUF1216)                                                                                                                                                                                                                                                                                                                                                                                                                                                                                                                                  |
| 247804_at   | At5g58170              | GDPDL7_SVL5__SHV3-like 5                                                                                                                                                                                                                                                                                                                                                                                                                                                                                                                                               |
| 247843_at   | At5g58050              | GDPDL6_SVL4__SHV3-like 4                                                                                                                                                                                                                                                                                                                                                                                                                                                                                                                                               |
| 248470_at   | At5g50830              | unknown protein; Has 4750 Blast hits to 3160 proteins in 341 species: Archae, 14; Bacteria, 239; Metazoa, 1329; Fungi, 394; Plants, 197; Viruses, 79; Other Eukaryotes, 2498 (source: NCBI BLink).                                                                                                                                                                                                                                                                                                                                                                     |
| 248534_at   | At5g50030              | Plant invertase/pectin methylesterase inhibitor superfamily protein                                                                                                                                                                                                                                                                                                                                                                                                                                                                                                    |
| 248581_at   | At5g49900              | Beta-glucosidase, GBA2 type family protein                                                                                                                                                                                                                                                                                                                                                                                                                                                                                                                             |
| 248714_at   | At5g48140              | Pectin lyase-like superfamily protein                                                                                                                                                                                                                                                                                                                                                                                                                                                                                                                                  |
| 248822_at   | At5g47000              | Peroxidase superfamily protein                                                                                                                                                                                                                                                                                                                                                                                                                                                                                                                                         |
| 248926_at   | At5g45880              | Pollen Ole e 1 allergen and extensin family protein                                                                                                                                                                                                                                                                                                                                                                                                                                                                                                                    |
| 249049_at   | At5g44340              | TUB4__tubulin beta chain 4                                                                                                                                                                                                                                                                                                                                                                                                                                                                                                                                             |
| 249402_at   | At5g40155              | Defensin-like (DEFL) family protein                                                                                                                                                                                                                                                                                                                                                                                                                                                                                                                                    |
| 249429_at   | At5g39880              | unknown protein; FUNCTIONS IN: molecular_function unknown; INVOLVED IN: biological_process unknown; LOCATED IN: endomembrane system; EXPRESSED IN: 10 plant structures; EXPRESSED DURING: L mature pollen stage, M germinated pollen stage, 4 anthesis, C globular stage, petal differentiation and expansion stage; BEST Arabidopsis thaliana protein match is: unknown protein (TAIR:AT3G28750.1); Has 25 Blast hits to 25 proteins in 3 species: Archae, 0; Bacteria, 2; Metazoa, 0; Fungi, 0; Plants, 23; Viruses, 0; Other Eukaryotes, 0 (source: NCBI BLink).    |
| 250154_at   | At5g15140              | Galactose mutarotase-like superfamily protein                                                                                                                                                                                                                                                                                                                                                                                                                                                                                                                          |
| 250606_s_at | At1g69940<br>At5g07410 | ATPME1_PPME1__Pectin lyase-like superfamily protein                                                                                                                                                                                                                                                                                                                                                                                                                                                                                                                    |
| 251250_at   | At3g62180              | Plant invertase/pectin methylesterase inhibitor superfamily protein                                                                                                                                                                                                                                                                                                                                                                                                                                                                                                    |
| 251252_at   | At3g62230              | DAF1__F-box family protein                                                                                                                                                                                                                                                                                                                                                                                                                                                                                                                                             |
| 251258_at   | At3g62170              | VGDH2__VANGUARD 1 homolog 2                                                                                                                                                                                                                                                                                                                                                                                                                                                                                                                                            |
| 251358_at   | At3g61160              | Protein kinase superfamily protein                                                                                                                                                                                                                                                                                                                                                                                                                                                                                                                                     |
| 251590_at   | At3g57690              | AGP23_ATAGP23__arabinogalactan protein 23                                                                                                                                                                                                                                                                                                                                                                                                                                                                                                                              |
| 251804_at   | At3g55430              | O-Glycosyl hydrolases family 17 protein                                                                                                                                                                                                                                                                                                                                                                                                                                                                                                                                |
| 252052_at   | At3g52600              | AtcwINV2_CWINV2__cell wall invertase 2                                                                                                                                                                                                                                                                                                                                                                                                                                                                                                                                 |
| 252085_s_at | At3g52000<br>At3g52010 | scpl36__serine carboxypeptidase-like 36                                                                                                                                                                                                                                                                                                                                                                                                                                                                                                                                |
| 252212_at   | At3g50310              | MAPKKK20_MKKK20__mitogen-activated protein kinase kinase kinase 20                                                                                                                                                                                                                                                                                                                                                                                                                                                                                                     |
| 252440_at   | At3g47440              | TIP5;1__tonoplast intrinsic protein 5;1                                                                                                                                                                                                                                                                                                                                                                                                                                                                                                                                |
| 252710_at   | At3g43860              | AtGH9A4_GH9A4__glycosyl hydrolase 9A4                                                                                                                                                                                                                                                                                                                                                                                                                                                                                                                                  |
| 253153_at   | At4g35700              | DAZ3__zinc finger (C2H2 type) family protein                                                                                                                                                                                                                                                                                                                                                                                                                                                                                                                           |
| 253526_at   | At4g31420              | Zinc finger protein 622                                                                                                                                                                                                                                                                                                                                                                                                                                                                                                                                                |
| 253599_at   | At4g30860              | ASHR3_SDG4__SET domain group 4                                                                                                                                                                                                                                                                                                                                                                                                                                                                                                                                         |
| 253660_at   | At4g30140              | CDEF1__GDSL-like Lipase/Acylhydrolase superfamily protein                                                                                                                                                                                                                                                                                                                                                                                                                                                                                                              |
| 254024_at   | At4g25780              | CAP (Cysteine-rich secretory proteins, Antigen 5, and Pathogenesis-related 1 protein) superfamily protein                                                                                                                                                                                                                                                                                                                                                                                                                                                              |
| 254123_at   | At4g24640              | APPB1__Plant invertase/pectin methylesterase inhibitor superfamily protein                                                                                                                                                                                                                                                                                                                                                                                                                                                                                             |
| 255479_at   | At4g02380              | AtLEA5_SAG21__senescence-associated gene 21                                                                                                                                                                                                                                                                                                                                                                                                                                                                                                                            |
| 256277_at   | At3g12120              | FAD2__fatty acid desaturase 2                                                                                                                                                                                                                                                                                                                                                                                                                                                                                                                                          |
| 256285_at   | At3g12510              | MADS-box family protein                                                                                                                                                                                                                                                                                                                                                                                                                                                                                                                                                |
| 256584_at   | At3g28750              | unknown protein; LOCATED IN: endomembrane system; EXPRESSED IN: 12 plant structures; EXPRESSED DURING: L mature pollen stage, M germinated pollen stage, 4 anthesis, C globular stage, petal differentiation and expansion stage; CONTAINS InterPro DOMAIN/s: Protein of unknown function DUF1216 (InterPro:IPR009605); BEST Arabidopsis thaliana protein match is: unknown protein (TAIR:AT5G39880.1); Has 37 Blast hits to 31 proteins in 5 species: Archae, 0; Bacteria, 0; Metazoa, 0; Fungi, 0; Plants, 28; Viruses, 0; Other Eukaryotes, 9 (source: NCBI BLink). |
| 256966_at   | At3g13400              | sks13__SKU5 similar 13                                                                                                                                                                                                                                                                                                                                                                                                                                                                                                                                                 |
| 257392_at   | At2g24450              | FLA3__FASCICLIN-like arabinogalactan protein 3 precursor                                                                                                                                                                                                                                                                                                                                                                                                                                                                                                               |

Table S1. Cont.

| Affy ID     | AGI ID                 | Annotation (Lookup from 2010-12-20)—for multiple identifier mappings only the annotation for the first identifier is shown, except in the case of the multi-line output option                                                                                                                                                                                                                                                                                                                                                                                      |
|-------------|------------------------|---------------------------------------------------------------------------------------------------------------------------------------------------------------------------------------------------------------------------------------------------------------------------------------------------------------------------------------------------------------------------------------------------------------------------------------------------------------------------------------------------------------------------------------------------------------------|
| 257469_at   | At1g49290              | unknown protein; BEST Arabidopsis thaliana protein match is: unknown protein (TAIR:AT5G13620.1); Has 99 Blast hits to 93 proteins in 11 species: Archae, 0; Bacteria, 0; Metazoa, 2; Fungi, 0; Plants, 97; Viruses, 0; Other Eukaryotes, 0 (source: NCBI BLink).                                                                                                                                                                                                                                                                                                    |
| 257809_at   | At3g27060              | ATTSO2_TSO2__Ferritin/ribonucleotide reductase-like family protein                                                                                                                                                                                                                                                                                                                                                                                                                                                                                                  |
| 257819_at   | At3g25165              | RALFL25__ralf-like 25                                                                                                                                                                                                                                                                                                                                                                                                                                                                                                                                               |
| 257886_at   | At3g17060              | Pectin lyase-like superfamily protein                                                                                                                                                                                                                                                                                                                                                                                                                                                                                                                               |
| 257981_at   | At3g20770              | AtEIN3_EIN3__Ethylene insensitive 3 family protein                                                                                                                                                                                                                                                                                                                                                                                                                                                                                                                  |
| 257986_at   | At3g20865              | AGP40__arabinogalactan protein 40                                                                                                                                                                                                                                                                                                                                                                                                                                                                                                                                   |
| 258077_at   | At3g26110              | Anther-specific protein agp1-like                                                                                                                                                                                                                                                                                                                                                                                                                                                                                                                                   |
| 258092_at   | At3g14595              | Ribosomal protein L18ae family                                                                                                                                                                                                                                                                                                                                                                                                                                                                                                                                      |
| 258279_at   | At3g26870              | Plant self-incompatibility protein S1 family                                                                                                                                                                                                                                                                                                                                                                                                                                                                                                                        |
| 258280_at   | At3g26880              | Plant self-incompatibility protein S1 family                                                                                                                                                                                                                                                                                                                                                                                                                                                                                                                        |
| 258326_at   | At3g22760              | SOL1__Tesmin/TSO1-like CXC domain-containing protein                                                                                                                                                                                                                                                                                                                                                                                                                                                                                                                |
| 258639_at   | At3g07820              | Pectin lyase-like superfamily protein                                                                                                                                                                                                                                                                                                                                                                                                                                                                                                                               |
| 258748_at   | At3g05930              | GLP8__germin-like protein 8                                                                                                                                                                                                                                                                                                                                                                                                                                                                                                                                         |
| 258889_at   | At3g05610              | Plant invertase/pectin methylesterase inhibitor superfamily                                                                                                                                                                                                                                                                                                                                                                                                                                                                                                         |
| 259044_at   | At3g03430              | Calcium-binding EF-hand family protein                                                                                                                                                                                                                                                                                                                                                                                                                                                                                                                              |
| 259189_at   | At3g01700              | AGP11_ATAGP11__arabinogalactan protein 11                                                                                                                                                                                                                                                                                                                                                                                                                                                                                                                           |
| 259266_at   | At3g01240              | unknown protein; FUNCTIONS IN: molecular_function unknown; INVOLVED IN: biological_process unknown; LOCATED IN: endomembrane system; EXPRESSED IN: 11 plant structures; EXPRESSED DURING: L mature pollen stage, M germinated pollen stage, 4 anthesis, C globular stage, petal differentiation and expansion stage; BEST Arabidopsis thaliana protein match is: unknown protein (TAIR:AT3G01230.1); Has 12 Blast hits to 12 proteins in 3 species: Archae, 0; Bacteria, 0; Metazoa, 0; Fungi, 0; Plants, 11; Viruses, 0; Other Eukaryotes, 1 (source: NCBI BLink). |
| 259269_at   | At3g01270              | Pectate lyase family protein                                                                                                                                                                                                                                                                                                                                                                                                                                                                                                                                        |
| 260386_at   | At1g74010              | Calcium-dependent phosphotriesterase superfamily protein                                                                                                                                                                                                                                                                                                                                                                                                                                                                                                            |
| 260847_s_at | At1g17290<br>At1g72330 | AlaAT1__alanine aminotransferase                                                                                                                                                                                                                                                                                                                                                                                                                                                                                                                                    |
| 260888_at   | At1g29140              | Pollen Ole e 1 allergen and extensin family protein                                                                                                                                                                                                                                                                                                                                                                                                                                                                                                                 |
| 261511_at   | At1g71770              | PAB5__poly(A)-binding protein 5                                                                                                                                                                                                                                                                                                                                                                                                                                                                                                                                     |
| 261623_at   | At1g01980              | FAD-binding Berberine family protein                                                                                                                                                                                                                                                                                                                                                                                                                                                                                                                                |
| 262122_at   | At1g02790              | PGA4__polygalacturonase 4                                                                                                                                                                                                                                                                                                                                                                                                                                                                                                                                           |
| 262282_at   | At1g68610              | PCR11__PLANT CADMIUM RESISTANCE 11                                                                                                                                                                                                                                                                                                                                                                                                                                                                                                                                  |
| 262291_at   | At1g70790              | Calcium-dependent lipid-binding (CaLB domain) family protein                                                                                                                                                                                                                                                                                                                                                                                                                                                                                                        |
| 262393_at   | At1g49490              | Leucine-rich repeat (LRR) family protein                                                                                                                                                                                                                                                                                                                                                                                                                                                                                                                            |
| 262571_at   | At1g15430              | Protein of unknown function (DUF1644)                                                                                                                                                                                                                                                                                                                                                                                                                                                                                                                               |
| 262620_at   | At1g06540              | unknown protein; BEST Arabidopsis thaliana protein match is: unknown protein (TAIR:AT2G30930.1); Has 16 Blast hits to 16 proteins in 3 species: Archae, 0; Bacteria, 0; Metazoa, 0; Fungi, 0; Plants, 16; Viruses, 0; Other Eukaryotes, 0 (source: NCBI BLink).                                                                                                                                                                                                                                                                                                     |
| 262676_at   | At1g75950              | ASK1_ATSKP1_SKP1_SKP1A_UIP1__S phase kinase-associated protein 1                                                                                                                                                                                                                                                                                                                                                                                                                                                                                                    |
| 262696_at   | At1g75870              | unknown protein; Has 10 Blast hits to 10 proteins in 5 species: Archae, 0; Bacteria, 0; Metazoa, 0; Fungi, 0; Plants, 10; Viruses, 0; Other Eukaryotes, 0 (source: NCBI BLink).                                                                                                                                                                                                                                                                                                                                                                                     |
| 262760_at   | At1g10770              | Plant invertase/pectin methylesterase inhibitor superfamily protein                                                                                                                                                                                                                                                                                                                                                                                                                                                                                                 |
| 262885_at   | At1g64740              | TUA1__alpha-1 tubulin                                                                                                                                                                                                                                                                                                                                                                                                                                                                                                                                               |
| 263043_at   | At1g23350              | Plant invertase/pectin methylesterase inhibitor superfamily protein                                                                                                                                                                                                                                                                                                                                                                                                                                                                                                 |
| 263215_at   | At1g30710              | FAD-binding Berberine family protein                                                                                                                                                                                                                                                                                                                                                                                                                                                                                                                                |
| 263681_at   | At1g26840              | ATORC6_ORC6__origin recognition complex protein 6                                                                                                                                                                                                                                                                                                                                                                                                                                                                                                                   |
| 265007_s_at | At1g61563<br>At1g61566 | RALFL8__ralf-like 8                                                                                                                                                                                                                                                                                                                                                                                                                                                                                                                                                 |
| 265022_at   | At1g24520              | BCP1__homolog of Brassica campestris pollen protein 1                                                                                                                                                                                                                                                                                                                                                                                                                                                                                                               |
| 265080_at   | At1g55570              | sks12__SKU5 similar 12                                                                                                                                                                                                                                                                                                                                                                                                                                                                                                                                              |
| 265127_at   | At1g55560              | sks14__SKU5 similar 14                                                                                                                                                                                                                                                                                                                                                                                                                                                                                                                                              |
| 265960_at   | At2g37470              | Histone superfamily protein                                                                                                                                                                                                                                                                                                                                                                                                                                                                                                                                         |
| 266750_s_at | At2g47030<br>At2g47040 | VGDH1__Plant invertase/pectin methylesterase inhibitor superfamily                                                                                                                                                                                                                                                                                                                                                                                                                                                                                                  |
| 266764_at   | At2g47050              | Plant invertase/pectin methylesterase inhibitor superfamily protein                                                                                                                                                                                                                                                                                                                                                                                                                                                                                                 |
| 266977_at   | At2g39420              | alpha/beta-Hydrolases superfamily protein                                                                                                                                                                                                                                                                                                                                                                                                                                                                                                                           |
| 267590_at   | At2g39700              | ATEXP4_ATEXPA4_ATHEXP ALPHA 1.6_EXPA4__expansin A4                                                                                                                                                                                                                                                                                                                                                                                                                                                                                                                  |

**Table 2.** List of genes that were identified as principal contributors to the deviation observed in Q over B and W, in the PCA analysis.

| Affy ID     | AGI ID                 | Annotation (Lookup from 2010-12-20)—for multiple identifier mappings only the annotation for the first identifier is shown, except in the case of the multi-line output option                                                                                                                                                                                                                                                                                                                                                                                                                           |
|-------------|------------------------|----------------------------------------------------------------------------------------------------------------------------------------------------------------------------------------------------------------------------------------------------------------------------------------------------------------------------------------------------------------------------------------------------------------------------------------------------------------------------------------------------------------------------------------------------------------------------------------------------------|
| 246099_at   | At5g20230              | ATBCB_BCB_BCB_SAG14__blue-copper-binding protein                                                                                                                                                                                                                                                                                                                                                                                                                                                                                                                                                         |
| 246208_at   | At4g36490              | ATSFH12_SF12__SEC14-like 12                                                                                                                                                                                                                                                                                                                                                                                                                                                                                                                                                                              |
| 246751_at   | At5g27870              | Plant invertase/pectin methylesterase inhibitor superfamily                                                                                                                                                                                                                                                                                                                                                                                                                                                                                                                                              |
| 246761_at   | At5g27980              | Seed maturation protein                                                                                                                                                                                                                                                                                                                                                                                                                                                                                                                                                                                  |
| 247512_at   | At5g61720              | Protein of unknown function (DUF1216)                                                                                                                                                                                                                                                                                                                                                                                                                                                                                                                                                                    |
| 248037_at   | At5g55930              | ATOPT1_OPT1__oligopeptide transporter 1                                                                                                                                                                                                                                                                                                                                                                                                                                                                                                                                                                  |
| 248194_at   | At5g54095              | unknown protein; FUNCTIONS IN: molecular_function unknown; INVOLVED IN: N-terminal protein myristoylation; LOCATED IN: cellular_component unknown; EXPRESSED IN: 9 plant structures; EXPRESSED DURING: L mature pollen stage, M germinated pollen stage, 4 anthesis, C globular stage, petal differentiation and expansion stage; BEST Arabidopsis thaliana protein match is: unknown protein (TAIR:AT4G27580.1); Has 30201 Blast hits to 17322 proteins in 780 species: Archae, 12; Bacteria, 1396; Metazoa, 17338; Fungi, 3422; Plants, 5037; Viruses, 0; Other Eukaryotes, 2996 (source: NCBI BLink). |
| 248758_at   | At5g47620              | RNA-binding (RRM/RBD/RNP motifs) family protein                                                                                                                                                                                                                                                                                                                                                                                                                                                                                                                                                          |
| 249447_at   | At5g39400              | ATPTEN1_PTEN1__Calcium/lipid-binding (CaLB) phosphatase                                                                                                                                                                                                                                                                                                                                                                                                                                                                                                                                                  |
| 249536_at   | At5g38760              | Late embryogenesis abundant protein (LEA) family protein                                                                                                                                                                                                                                                                                                                                                                                                                                                                                                                                                 |
| 250358_at   | At5g11740              | AGP15_ATAGP15__arabinogalactan protein 15                                                                                                                                                                                                                                                                                                                                                                                                                                                                                                                                                                |
| 250608_at   | At5g07420              | Pectin lyase-like superfamily protein                                                                                                                                                                                                                                                                                                                                                                                                                                                                                                                                                                    |
| 250917_at   | At5g03690              | Aldolase superfamily protein                                                                                                                                                                                                                                                                                                                                                                                                                                                                                                                                                                             |
| 251228_at   | At3g62710              | Glycosyl hydrolase family protein                                                                                                                                                                                                                                                                                                                                                                                                                                                                                                                                                                        |
| 251258_at   | At3g62170              | VGDH2__VANGUARD 1 homolog 2                                                                                                                                                                                                                                                                                                                                                                                                                                                                                                                                                                              |
| 252085_s_at | At3g52000<br>At3g52010 | scpl36__serine carboxypeptidase-like 36                                                                                                                                                                                                                                                                                                                                                                                                                                                                                                                                                                  |
| 252710_at   | At3g43860              | AtGH9A4_GH9A4__glycosyl hydrolase 9A4                                                                                                                                                                                                                                                                                                                                                                                                                                                                                                                                                                    |
| 252820_at   | At3g42640              | AHA8_HA8__H(+)-ATPase 8                                                                                                                                                                                                                                                                                                                                                                                                                                                                                                                                                                                  |
| 254001_at   | At4g26260              | MIOX4__myo-inositol oxygenase 4                                                                                                                                                                                                                                                                                                                                                                                                                                                                                                                                                                          |
| 254716_at   | At4g13560              | UNE15__Late embryogenesis abundant protein (LEA) family protein                                                                                                                                                                                                                                                                                                                                                                                                                                                                                                                                          |
| 256385_at   | At1g66580              | RPL10C_SAG24__senescence associated gene 24                                                                                                                                                                                                                                                                                                                                                                                                                                                                                                                                                              |
| 256580_s_at | At3g28810<br>At3g28820 | Protein of unknown function (DUF1216)                                                                                                                                                                                                                                                                                                                                                                                                                                                                                                                                                                    |
| 256581_at   | At3g28830              | Protein of unknown function (DUF1216)                                                                                                                                                                                                                                                                                                                                                                                                                                                                                                                                                                    |
| 256588_at   | At3g28790              | Protein of unknown function (DUF1216)                                                                                                                                                                                                                                                                                                                                                                                                                                                                                                                                                                    |
| 256955_at   | At3g13390              | sks11__SKU5 similar 11                                                                                                                                                                                                                                                                                                                                                                                                                                                                                                                                                                                   |
| 257077_at   | At3g19690              | CAP (Cysteine-rich secretory proteins, Antigen 5, and Pathogenesis-related 1 protein) superfamily protein                                                                                                                                                                                                                                                                                                                                                                                                                                                                                                |
| 257090_at   | At3g20530              | Protein kinase superfamily protein                                                                                                                                                                                                                                                                                                                                                                                                                                                                                                                                                                       |
| 257121_at   | At3g20210<br>At3g20220 | DELTA-VPE_DELTAVPE__delta vacuolar processing enzyme                                                                                                                                                                                                                                                                                                                                                                                                                                                                                                                                                     |
| 257532_at   | At3g04700<br>At3g04710 | Protein of unknown function (DUF1685)                                                                                                                                                                                                                                                                                                                                                                                                                                                                                                                                                                    |
| 257736_at   | At3g27410              | unknown protein; Has 10 Blast hits to 10 proteins in 2 species: Archae, 0; Bacteria, 0; Metazoa, 0; Fungi, 0; Plants, 10; Viruses, 0; Other Eukaryotes, 0 (source: NCBI BLink).                                                                                                                                                                                                                                                                                                                                                                                                                          |
| 257821_at   | At3g25170              | RALFL26__ralf-like 26                                                                                                                                                                                                                                                                                                                                                                                                                                                                                                                                                                                    |
| 258058_at   | At3g28980              | Protein of unknown function (DUF1216)                                                                                                                                                                                                                                                                                                                                                                                                                                                                                                                                                                    |
| 258498_at   | At3g02480              | Late embryogenesis abundant protein (LEA) family protein                                                                                                                                                                                                                                                                                                                                                                                                                                                                                                                                                 |
| 258639_at   | At3g07820              | Pectin lyase-like superfamily protein                                                                                                                                                                                                                                                                                                                                                                                                                                                                                                                                                                    |
| 258645_s_at | At3g07850<br>At3g14040 | Pectin lyase-like superfamily protein                                                                                                                                                                                                                                                                                                                                                                                                                                                                                                                                                                    |
| 258677_at   | At3g08730              | ATPK1_ATPK6_ATS6K1_PK1_PK6_S6K1__protein-serine kinase 1                                                                                                                                                                                                                                                                                                                                                                                                                                                                                                                                                 |
| 258680_at   | At3g08580              | AAC1__ADP/ATP carrier 1                                                                                                                                                                                                                                                                                                                                                                                                                                                                                                                                                                                  |
| 259064_at   | At3g07490              | AGD11_AtCML3_CML3__ARF-GAP domain 11                                                                                                                                                                                                                                                                                                                                                                                                                                                                                                                                                                     |
| 262664_at   | At1g13970              | Protein of unknown function (DUF1336)                                                                                                                                                                                                                                                                                                                                                                                                                                                                                                                                                                    |
| 262885_at   | At1g64740              | TUA1__alpha-1 tubulin                                                                                                                                                                                                                                                                                                                                                                                                                                                                                                                                                                                    |
| 263062_at   | At2g18180              | Sec14p-like phosphatidylinositol transfer family protein                                                                                                                                                                                                                                                                                                                                                                                                                                                                                                                                                 |
| 263144_at   | At1g54070              | Dormancy/auxin associated family protein                                                                                                                                                                                                                                                                                                                                                                                                                                                                                                                                                                 |
| 264923_s_at | At1g60740<br>At1g65970 | Thioredoxin superfamily protein                                                                                                                                                                                                                                                                                                                                                                                                                                                                                                                                                                          |
| 264993_at   | At1g67290              | GLOX1__glyoxal oxidase-related protein                                                                                                                                                                                                                                                                                                                                                                                                                                                                                                                                                                   |
| 265404_at   | At2g16730              | BGAL13__glycosyl hydrolase family 35 protein                                                                                                                                                                                                                                                                                                                                                                                                                                                                                                                                                             |
| 266029_at   | At2g05850              | scpl38__serine carboxypeptidase-like 38                                                                                                                                                                                                                                                                                                                                                                                                                                                                                                                                                                  |
| 266428_at   | At2g07180              | Protein kinase superfamily protein                                                                                                                                                                                                                                                                                                                                                                                                                                                                                                                                                                       |
| 266592_at   | At2g46210              | AtSLD2_SLD2__Fatty acid/sphingolipid desaturase                                                                                                                                                                                                                                                                                                                                                                                                                                                                                                                                                          |
| 266765_at   | At2g46860              | AtPPa3_PP3__pyrophosphorylase 3                                                                                                                                                                                                                                                                                                                                                                                                                                                                                                                                                                          |
| 266918_at   | At2g45800              | PLIM2a__GATA type zinc finger transcription factor family protein                                                                                                                                                                                                                                                                                                                                                                                                                                                                                                                                        |
| 267590_at   | At2g39700              | ATEXP4_ATEXPA4_ATHXP ALPHA 1.6_EXPA4__expansin A4                                                                                                                                                                                                                                                                                                                                                                                                                                                                                                                                                        |

**Table 3.** List of genes that were identified as principal contributors to the deviation observed in W over B and Q, in the PCA analysis.

| Affy ID     | AGI ID                 | Annotation (Lookup from 2010-12-20)—for multiple identifier mappings only the annotation for the first identifier is shown, except in the case of the multi-line output option                                                                                                                                                                                                                        |
|-------------|------------------------|-------------------------------------------------------------------------------------------------------------------------------------------------------------------------------------------------------------------------------------------------------------------------------------------------------------------------------------------------------------------------------------------------------|
| 245700_at   | At5g04180              | ACA3_ATACA3__alpha carbonic anhydrase 3                                                                                                                                                                                                                                                                                                                                                               |
| 245946_at   | At5g19580              | glyoxal oxidase-related protein                                                                                                                                                                                                                                                                                                                                                                       |
| 245956_s_at | At5g28540<br>At5g42020 | BIP1__heat shock protein 70 (Hsp 70) family protein                                                                                                                                                                                                                                                                                                                                                   |
| 246099_at   | At5g20230              | ATBCB_BCB_BCB_SAG14__blue-copper-binding protein                                                                                                                                                                                                                                                                                                                                                      |
| 246118_at   | At5g20340              | BG5__beta-1,3-glucanase 5                                                                                                                                                                                                                                                                                                                                                                             |
| 246631_at   | At1g50740              | Transmembrane proteins 14C                                                                                                                                                                                                                                                                                                                                                                            |
| 248038_at   | At5g55980              | serine-rich protein-related                                                                                                                                                                                                                                                                                                                                                                           |
| 248470_at   | At5g50830              | unknown protein; Has 4750 Blast hits to 3160 proteins in 341 species: Archae, 14; Bacteria, 239; Metazoa, 1329; Fungi, 394; Plants, 197; Viruses, 79; Other Eukaryotes, 2498 (source: NCBI BLink).                                                                                                                                                                                                    |
| 249049_at   | At5g44340              | TUB4__tubulin beta chain 4                                                                                                                                                                                                                                                                                                                                                                            |
| 249187_at   | At5g43060              | Granulin repeat cysteine protease family protein                                                                                                                                                                                                                                                                                                                                                      |
| 249243_s_at | At5g42260<br>At5g44640 | BGLU12__beta glucosidase 12                                                                                                                                                                                                                                                                                                                                                                           |
| 249375_at   | At5g40730              | AGP24_ATAGP24__arabinogalactan protein 24                                                                                                                                                                                                                                                                                                                                                             |
| 249584_s_at | At5g37810<br>At5g37820 | NIP4;1_NLM4__NOD26-like intrinsic protein 4;1                                                                                                                                                                                                                                                                                                                                                         |
| 250174_at   | At5g14380              | AGP6__arabinogalactan protein 6                                                                                                                                                                                                                                                                                                                                                                       |
| 250631_at   | At5g07430              | Pectin lyase-like superfamily protein                                                                                                                                                                                                                                                                                                                                                                 |
| 251250_at   | At3g62180              | Plant invertase/pectin methylesterase inhibitor superfamily protein                                                                                                                                                                                                                                                                                                                                   |
| 253226_at   | At4g35010              | BGAL11__beta-galactosidase 11                                                                                                                                                                                                                                                                                                                                                                         |
| 253814_at   | At4g28290              | unknown protein; FUNCTIONS IN: molecular_function unknown; INVOLVED IN: biological_process unknown; LOCATED IN: chloroplast; EXPRESSED IN: 23 plant structures; EXPRESSED DURING: 15 growth stages; Has 45 Blast hits to 45 proteins in 11 species: Archae, 0; Bacteria, 0; Metazoa, 0; Fungi, 0; Plants, 45; Viruses, 0; Other Eukaryotes, 0 (source: NCBI BLink).                                   |
| 253831_at   | At4g27580              | unknown protein; FUNCTIONS IN: molecular_function unknown; INVOLVED IN: biological_process unknown; LOCATED IN: mitochondrion, cell wall; EXPRESSED IN: 9 plant structures; EXPRESSED DURING: 6 growth stages; Has 30201 Blast hits to 17322 proteins in 780 species: Archae, 12; Bacteria, 1396; Metazoa, 17338; Fungi, 3422; Plants, 5037; Viruses, 0; Other Eukaryotes, 2996 (source: NCBI BLink). |
| 255515_at   | At4g02250              | Plant invertase/pectin methylesterase inhibitor superfamily protein                                                                                                                                                                                                                                                                                                                                   |
| 256277_at   | At3g12120              | FAD2__fatty acid desaturase 2                                                                                                                                                                                                                                                                                                                                                                         |
| 259866_at   | At1g76640              | Calcium-binding EF-hand family protein                                                                                                                                                                                                                                                                                                                                                                |
| 260401_at   | At1g69840              | SPFH/Band 7/PHB domain-containing membrane-associated protein family                                                                                                                                                                                                                                                                                                                                  |
| 260943_at   | At1g45145              | ATH5_ATTRX5_LIV1_TRX5__thioredoxin H-type 5                                                                                                                                                                                                                                                                                                                                                           |
| 262022_at   | At1g35490              | bZIP family transcription factor                                                                                                                                                                                                                                                                                                                                                                      |
| 263126_at   | At1g78460              | SOUL heme-binding family protein                                                                                                                                                                                                                                                                                                                                                                      |
| 263950_at   | At2g36020              | HVA22J__HVA22-like protein J                                                                                                                                                                                                                                                                                                                                                                          |
| 264655_at   | At1g09070              | (AT)SRC2_SRC2__soybean gene regulated by cold-2                                                                                                                                                                                                                                                                                                                                                       |
| 266428_at   | At2g07180              | Protein kinase superfamily protein                                                                                                                                                                                                                                                                                                                                                                    |

**Table 4.** List of primers used in the qPCR assay.

| AGI ID    | Primer ID       | Forward primer           | Reverse primer           |
|-----------|-----------------|--------------------------|--------------------------|
| At4g27960 | UBC9            | GTTTCACCACCCTTTCTTC      | AAATCCCACGATCAAATTCC     |
| At5g59370 | ACT4            | CACCAAACGAAGACGGAAGT     | CATTGGGAGTGGAAAATTGTTT   |
| At1g71380 | CEL3            | TCTCCAAGTCATTGCTCTTCTTC  | CGTTGTCTCCTGCGTCATAGTAC  |
| At3g60570 | EXPB5           | GCAAACGGTGATGGAACTTCG    | GGACACGGCGGAGGTAAGC      |
| At5g11110 | SPS2F           | TGGTGGTGTTCGTGGGAGATTGAG | TTAGCCTCGGTGATGTTGGGACTG |
| At5g42260 | BGLU13          | CCATTGGGACACACCGCAAAGC   | ACACCTTCTGGAGCCATTACACC  |
| At3g02870 | VTC4            | GAGACATTCTGATGGACCTTACG  | TCCGAGACTTAACGATTGATTGG  |
| At5g14380 | AGP6            | TTCTAAGTTAAGTCGTCCAC     | GACATTTAGGTTTATATTTACTCC |
| At3g01700 | AGP11           | CCACGTAATGTCAAGC         | CAACAGGGGATGATGCTTTTC    |
| At3g57690 | AGP23           | AATGGAGATGAAGAAGATTG     | TGCAAGTAGTAGCTGAAG       |
| At5g40730 | AGP24           | CGGTTACAGATGGAGGAGGCACTC | AGGACACCACACGTAGCCACAATC |
| At3g20865 | AGP40           | GCGGCTACAATGGAGTCTC      | CAAGAAGGCGGAGAGTGATG     |
| AT4G35010 | BGAL11          | GGAATGGGAAAAGGGTTGAT     | GCTCAGGCTTCACATTAGGC     |
| AT2G16730 | BGAL13          | AAACAAGGCGGTTGAACAC      | GGAACTCTCCATTGCTCCA      |
| AT3G01040 | GAUT13          | GAATTTTGTGGTGTCTGT       | ACAACATCACCTCCCTACGC     |
| AT1G06780 | GAUT6           | CGGCTTAAGAGCATCACTCC     | CCATCACTTTTACGACAGACGA   |
| At3g18780 | ACT2            | GTGCTGGATTCTGGTGATGGTGTG | CGTTGTCTCCTGCGTCATAGTAC  |
| At4g33240 | PI4K            | TCCTCCAGCCACACGCAGAATTG  | GAAGCATAGCGGAAGCAAGCAACC |
| At5g60250 | C3HC4-Type ring | CCATTGGGACACACCGCAAAGC   | ACACCTTCTGGAGCCATTACACC  |
| AT5G12030 | HSP17.6C-CL     | GGCAAACGACCCCGTATG       | TTCACCTTTCCTTCTCAGTCC    |
| At2g39890 | PROT1           | ATGGCCAGAGGCGGGTAC       | GTGGTTGGCTAGAATGAATGTGAG |
| At1g50490 | UBC20           | AGATCCTCCGGCTCTAATGG     | TGCTTCTGTTATTGCTCCCTTTC  |
| At1g50490 | UBQ10           | GCTCCGACACCATTGACAAC     | ACGCAGGACCAAGTGAAGAG     |
| AT1G69940 | PPME1           | ATGCCTACACCGAGATGACC     | AGTTTACAAAGCGGGTGGTG     |
| AT2G47040 | VGD1            | ACTGGCCCAAGTCATTCAAC     | CCACCGAGACCACAACCTTTT    |

**Figure 1.** Functional classification of the genes listed in Table S1 that produced the most diverging transcript levels. Most of the genes are associated to cell organization and biogenesis, and developmental processes. Most of them are extracellular or located at the cell wall, and the most conspicuous functional annotation relates to hydrolase activity.

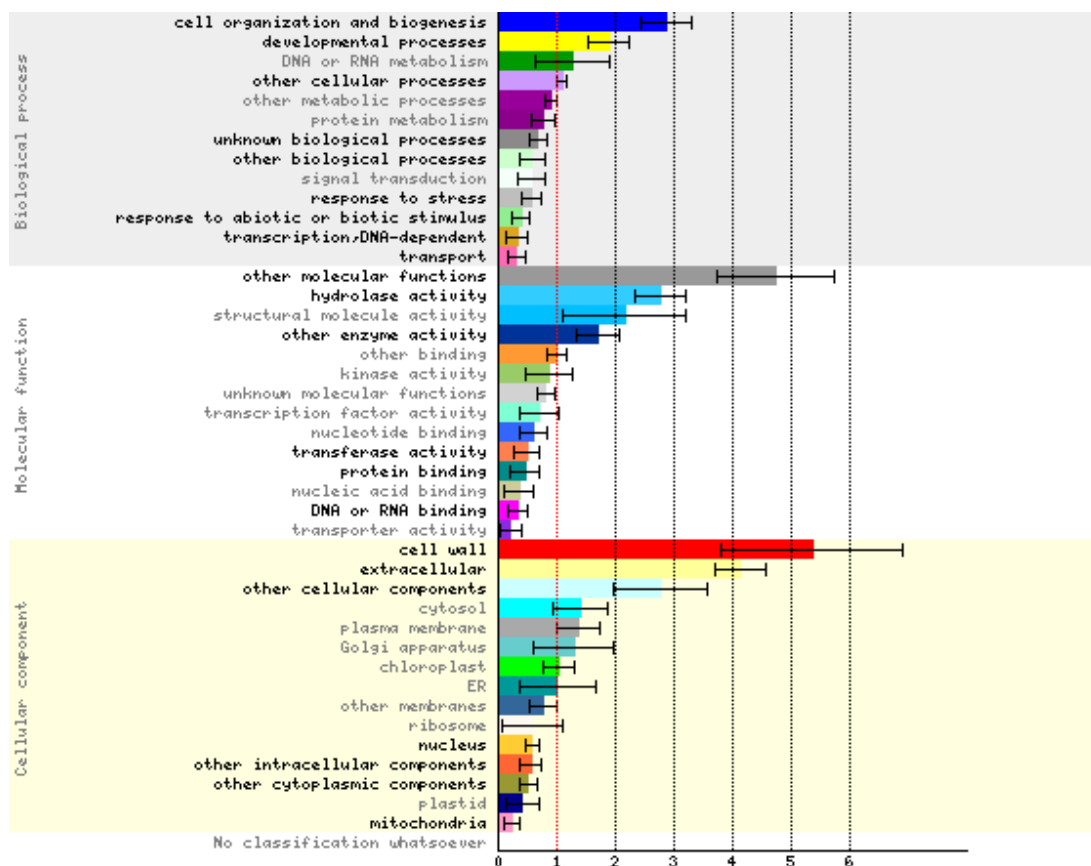



**Figure 2.** Functional classification of the genes listed in Table 2 that produced the most diverging transcript levels. Most of the genes are associated to cell organization and biogenesis, protein metabolism and developmental processes, most of them are located at the cell wall or are extracellular, and the most conspicuous functional annotation relates to hydrolase activity, transporter and other molecular functions.

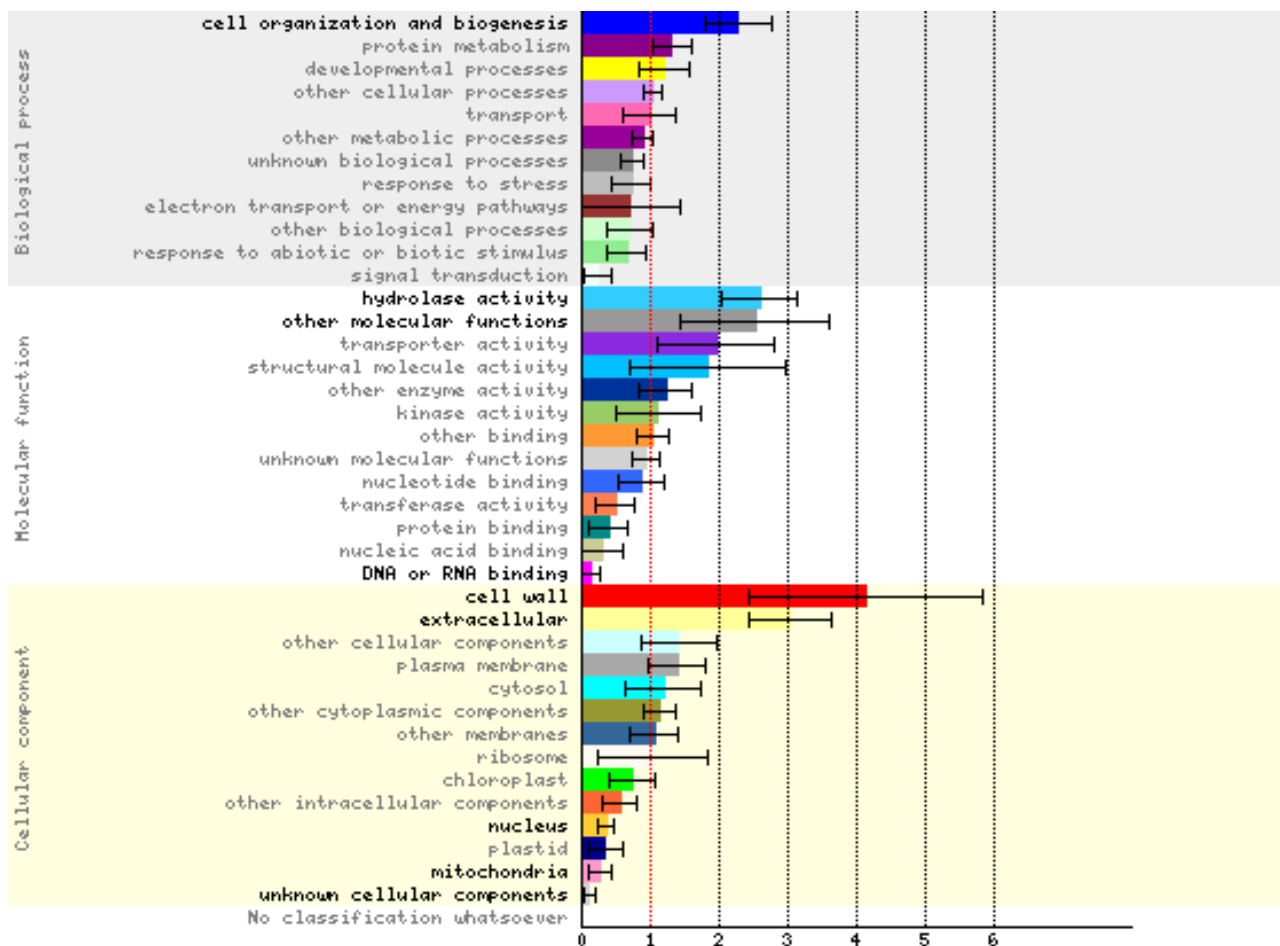

**Figure 3.** Functional classification of the genes listed in Table 3 that produced the most diverging transcript levels. Most of the genes are associated with cell organization and biogenesis, response to biotic and abiotic stimulus, response to stress and transport, most of them are extracellular or located at the Endoplasmic reticulum and cell wall, and the most conspicuous functional annotation relates to hydrolase activity.

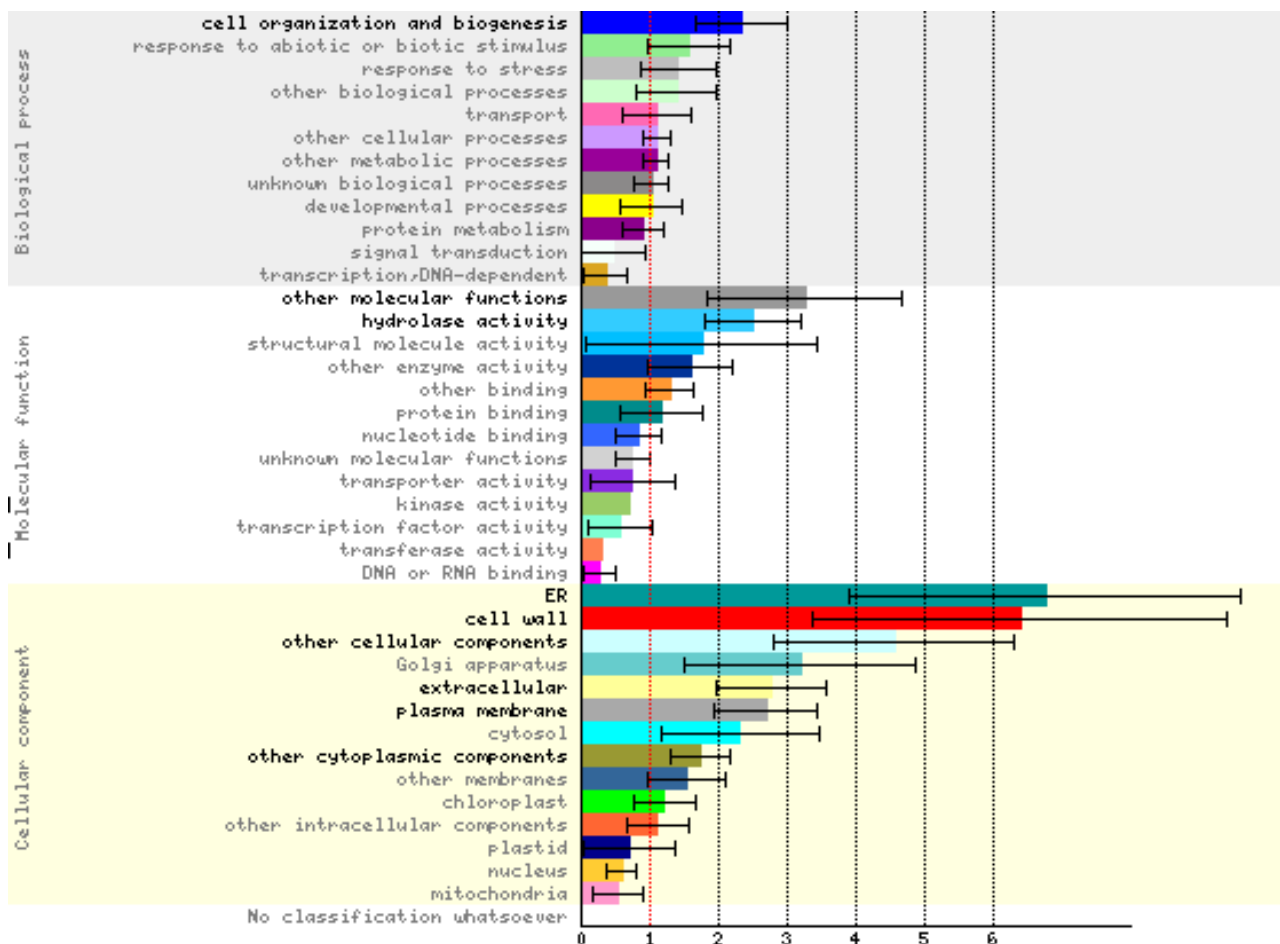

Supplement: s1 [file s1]
